# Supplementary material for: A Multisample Approach in Forensic Phenotyping of Chronological Old Skeletal Remains Using Massive Parallel Sequencing (MPS) Technology
Source: MDPI journal article supplement (doi:10.3390/genes14071449), 2023-07-14
Supplement: s1 [file s1]

**Table S1:** Characteristics (skeleton, sample number, skeletal type, extraction negative control - ENC), PowerQuant results (DNA quantity - Auto target, Deg target – both expressed in ng DNA in µl of extract , IPC shift and degradation index - DI), DNA quantity expressed in ng DNA per g of bone powder, PCR-MPS HIrisPlex template DNA input expressed in ng of DNA, and effectiveness of autosomal ESI 17 Fast STR typing - expressed as the number of successfully typed loci out of all loci present in amplification kit (16 STR loci and amelogenin).

| Skeleton, sample no. | Skeletal type                    | DNA quantity-AUTO target (ng/µl) | DEG target (ng/µl) | IPC shift | Deg. Index (DI) | DNA quantity (ng/g bone) | PCR-MPS HIrisPlex template DNA input quantity (ng) | ESI 17 Fast (STR, amelogenin) |
|----------------------|----------------------------------|----------------------------------|--------------------|-----------|-----------------|--------------------------|----------------------------------------------------|-------------------------------|
| 1-S 1                | <b>Talus bone</b>                | 0.067                            | 0.026              | -0.05     | 2.6             | 6.7                      | 1.00                                               | 17/17                         |
| 1-S 2                | Lumbar vertebra                  | 0.017                            | 0.005              | -0.32     | 3.8             | 1.7                      | 0.26                                               | 17/17                         |
| 1-S 3                | Femur                            | 0.015                            | 0.007              | -0.43     | 2.2             | 1.5                      | 0.23                                               | 17/17                         |
| 2-S 4                | 1st distal hand phalanx          | 0.014                            | 0.001              | -0.85     | 16.0            | 1.4                      | 0.21                                               | 17/17                         |
| 2-S 5                | Metacarpal I                     | 0.013                            | 0.002              | -0.85     | 7.4             | 1.3                      | 0.20                                               | 17/17                         |
| 2-S 6                | Thoracic vertebra                | 0.020                            | 0.001              | -0.82     | 16.0            | 2.0                      | 0.30                                               | 17/17                         |
| 3-S 7                | <b>Tibia</b>                     | 0.092                            | 0.012              | -0.49     | 7.6             | 9.2                      | 1.00                                               | 17/17                         |
| 3-S 8                | Femur                            | 0.060                            | 0.011              | -0.54     | 5.2             | 6.0                      | 0.90                                               | 17/17                         |
| 3-S 9                | Metatarsal III                   | 0.020                            | 0.001              | -0.27     | 16.3            | 2.0                      | 0.30                                               | 17/17                         |
| 4-S 10               | Talus bone                       | 0.039                            | 0.004              | -0.58     | 9.6             | 3.9                      | 0.59                                               | 17/17                         |
| 4-S 11               | Metatarsal II                    | 0.010                            | /                  | -0.16     | undet           | 1.0                      | 0.15                                               | 11/17                         |
| 4-S 12               | Calcaneus                        | 0.017                            | 0.001              | -0.56     | 16.1            | 1.7                      | 0.26                                               | 17/17                         |
| 5-S 13               | <b>Metacarpal IV</b>             | 0.087                            | 0.003              | -0.39     | 33.4            | 8.7                      | 1.00                                               | 17/17                         |
| 5-S 14               | <b>Thoracic vertebra</b>         | 0.114                            | 0.020              | -0.4      | 5.8             | 11.4                     | 1.00                                               | 17/17                         |
| 5-S 15               | <b>Metacarpal II</b>             | 0.105                            | 0.003              | -0.36     | 40.0            | 10.5                     | 1.00                                               | 17/17                         |
| 6-S 16               | <b>Metacarpal II</b>             | 0.234                            | 0.021              | -0.46     | 11.2            | 23.4                     | 1.00                                               | 17/17                         |
| 6-S 17               | <b>Metatarsal II</b>             | 0.482                            | 0.041              | -0.33     | 11.7            | 48.2                     | 1.00                                               | 17/17                         |
| 6-S 18               | <b>Capitate bone</b>             | 0.279                            | 0.047              | -0.50     | 5.9             | 27.9                     | 1.00                                               | 17/17                         |
| 7-S 19               | <b>Metatarsal I</b>              | 0.402                            | 0.101              | -0.04     | 4.0             | 40.2                     | 1.00                                               | 17/17                         |
| 7-S 20               | <b>Medial cuneiform</b>          | 0.221                            | 0.046              | -0.19     | 4.9             | 22.1                     | 1.00                                               | 17/17                         |
| 7-S 21               | <b>1st proximal hand phalanx</b> | 0.292                            | 0.080              | -0.23     | 3.7             | 29.2                     | 1.00                                               | 17/17                         |
| 8-S 22               | <b>Metacarpal IV</b>             | 0.374                            | 0.039              | -0.31     | 9.5             | 37.4                     | 1.00                                               | 17/17                         |
| 8-S 23               | <b>Metatarsal IV</b>             | 0.164                            | 0.010              | -0.31     | 16.2            | 16.4                     | 1.00                                               | 17/17                         |
| 8-S 24               | <b>Metacarpal V</b>              | 0.284                            | 0.038              | -0.42     | 7.5             | 28.4                     | 1.00                                               | 17/17                         |
| ENC 1                |                                  | /                                | /                  | -0.34     | /               | /                        |                                                    | 0/17                          |
| ENC 2                |                                  | /                                | /                  | -0.14     | /               | /                        |                                                    | 0/17                          |
| ENC 3                |                                  | /                                | /                  | -0.40     | /               | /                        |                                                    | 0/17                          |
| ENC 4                |                                  | /                                | /                  | -0.36     | /               | /                        |                                                    | 0/17                          |

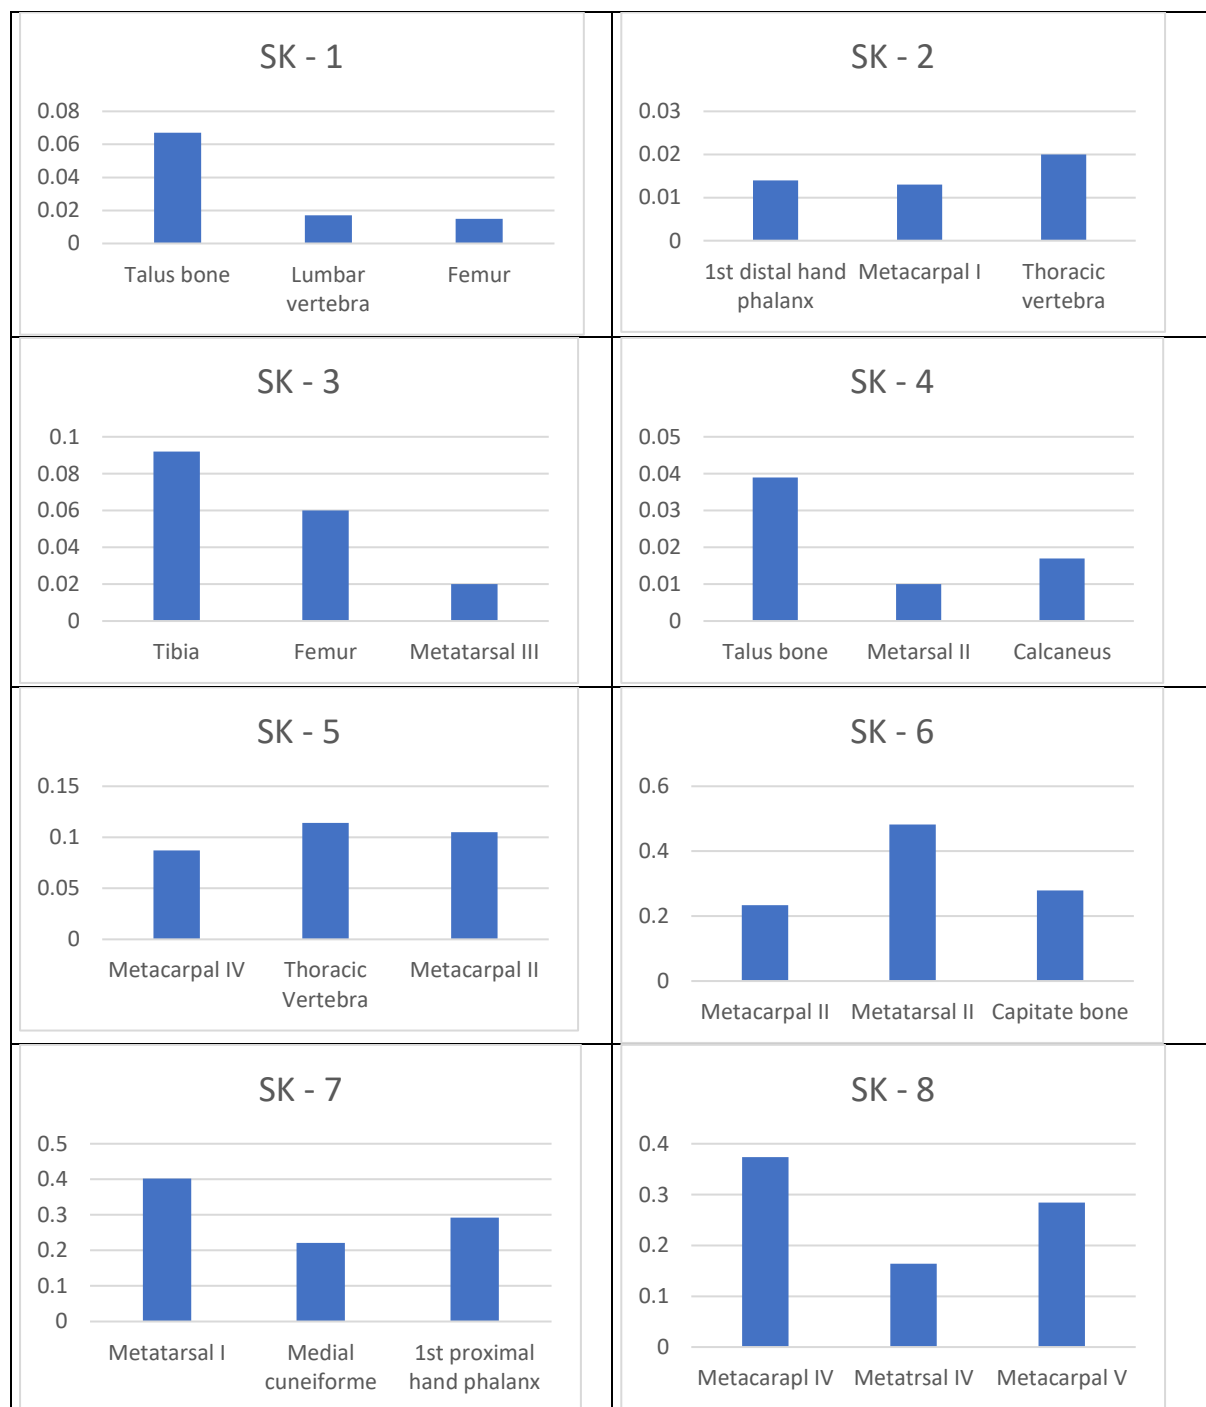

**Figure S1:** DNA quantity - PowerQuant Auto target (expressed in ng DNA/μL of extract) for three skeletal element types analyzed per each skeleton.
