# Supplementary material for: A Multisample Approach in Forensic Phenotyping of Chronological Old Skeletal Remains Using Massive Parallel Sequencing (MPS) Technology
Source: MDPI journal article supplement (doi:10.3390/genes14071449), 2023-07-14
Supplement: s1 [file s1]

**Table S3:** Coverage values for HIRisPlex SNP markers and their corresponding genes for 24 bone samples from 8 skeletons excavated from the Huda Jama Mass Grave. Threshold for >100 pg DNA input is shown in third column.

| Gene         | SNP marker   | Threshold | Coverage values |          |          |          |          |          |          |          |
|--------------|--------------|-----------|-----------------|----------|----------|----------|----------|----------|----------|----------|
|              |              |           | Sample 1        | Sample 2 | Sample 3 | Sample 4 | Sample 5 | Sample 6 | Sample 7 | Sample 8 |
| MC1R         | rs 11547464  | 249       | 37542           | 41059    | 81243    | 13319    | 45893    | 79117    | 78973    | 98757    |
| MC1R         | rs 885479    | 246       | 37259           | 40686    | 80539    | 13125    | 45149    | 78551    | 78813    | 99982    |
| MC1R         | rs1805008    | 249       | 37549           | 41203    | 81211    | 13307    | 45851    | 79153    | 79406    | 99950    |
| MC1R         | rs 1805005   | 308       | 14914           | 10618    | 16270    | 7306     | 12353    | 21692    | 30444    | 16761    |
| MC1R         | rs 1805006   | 318       | 14889           | 10666    | 16330    | 7363     | 12413    | 21817    | 30533    | 16824    |
| MC1R         | rs 1805007   | 249       | 37570           | 41255    | 81271    | 13334    | 45948    | 79226    | 79095    | 98836    |
| TUBB3        | rs 1805009   | 266       | 32792           | 32930    | 73158    | 15386    | 240838   | 41949    | 66347    | 72780    |
| MC1R         | rs 201326893 | 249       | 37605           | 41277    | 80612    | 13349    | 45976    | 79267    | 79539    | 99986    |
| MC1R         | rs 2228479   | 320       | 14818           | 10445    | 15700    | 7190     | 12101    | 21285    | 30312    | 16473    |
| MC1R         | rs 1110400   | 248       | 37568           | 41254    | 81288    | 13340    | 45934    | 79238    | 79479    | 99572    |
| SLC45A2      | rs 28777     | 307       | 64987           | 52916    | 99704    | 38338    | 64648    | 99716    | 88374    | 69083    |
| SLC45A2      | rs 16891982  | 179       | 8727            | 3265     | 4478     | 3155     | 12229    | 13100    | 12673    | 14483    |
| KITLG        | rs 12821256  | 215       | 14866           | 5125     | 8618     | 3982     | 10738    | 14518    | 17591    | 40604    |
| LOC105374875 | rs 4959270   | 201       | 15952           | 7823     | 11967    | 4755     | 12227    | 16509    | 17889    | 23764    |
| IRF4         | rs 12203592  | 206       | 34991           | 14310    | 33389    | 13371    | 40297    | 66578    | 52783    | 70818    |
| TYR          | rs 1042602   | 210       | 38507           | 22419    | 41412    | 14690    | 47402    | 49586    | 37226    | 52033    |
| OCA2         | rs 1800407   | 288       | 40494           | 20478    | 41174    | 15373    | 32248    | 65435    | 68649    | 57026    |
| SLC24SA4     | rs 2402130   | 286       | 37871           | 28081    | 46674    | 16852    | 33883    | 47031    | 32636    | 34740    |
| HERC2        | rs 12913832  | 391       | 53095           | 28765    | 52825    | 18528    | 64089    | 72979    | 76645    | 98973    |
| PIGU         | rs 2378249   | 182       | 51181           | 44443    | 62098    | 25151    | 57484    | 72870    | 53424    | 41925    |
| LOC105370627 | rs 12896399  | 284       | 41970           | 28540    | 48012    | 20220    | 40538    | 64760    | 41825    | 59710    |
| TYR          | rs 1393350   | 189       | 66371           | 38460    | 78699    | 24563    | 45513    | 97140    | 50002    | 63386    |
| TYRP1        | rs 683       | 254       | 26340           | 12059    | 23333    | 8891     | 28938    | 38930    | 27093    | 27123    |

| Gene         | Marker       | Threshold | Coverage values (continued) |           |           |           |           |           |           |           |
|--------------|--------------|-----------|-----------------------------|-----------|-----------|-----------|-----------|-----------|-----------|-----------|
|              |              |           | Sample 9                    | Sample 10 | Sample 11 | Sample 12 | Sample 13 | Sample 14 | Sample 15 | Sample 16 |
| MC1R         | rs 11547464  | 249       | 75444                       | 18000     | 20004     | 43055     | 30413     | 19615     | 31708     | 38082     |
| MC1R         | rs 885479    | 246       | 74998                       | 17827     | 19824     | 42843     | 30153     | 19459     | 31511     | 37849     |
| MC1R         | rs1805008    | 249       | 75370                       | 17989     | 19992     | 43190     | 30391     | 19632     | 31453     | 38100     |
| MC1R         | rs 1805005   | 308       | 29092                       | 7580      | 9420      | 10226     | 8210      | 8203      | 7895      | 20868     |
| MC1R         | rs 1805006   | 318       | 29122                       | 7616      | 9449      | 10274     | 8197      | 8228      | 7923      | 20874     |
| MC1R         | rs 1805007   | 249       | 75021                       | 18015     | 41244     | 43268     | 30430     | 19657     | 31727     | 38132     |
| TUBB3        | rs 1805009   | 266       | 52460                       | 15769     | 34707     | 31172     | 31321     | 22476     | 33181     | 35975     |
| MC1R         | rs 201326893 | 249       | 75864                       | 18028     | 20021     | 43272     | 30178     | 19663     | 31751     | 27871     |
| MC1R         | rs 2228479   | 320       | 28985                       | 7532      | 9178      | 10096     | 8189      | 8129      | 7832      | 20603     |
| MC1R         | rs 1110400   | 248       | 76177                       | 18018     | 20020     | 43244     | 30444     | 19645     | 31720     | 38105     |
| SLC45A2      | rs 28777     | 307       | 47671                       | 27426     | 68458     | 82661     | 57760     | 43243     | 74540     | 80139     |
| SLC45A2      | rs 16891982  | 179       | 4185                        | 7352      | 13285     | 6771      | 15160     | 8017      | 12002     | 15427     |
| KITLG        | rs 12821256  | 215       | 9151                        | 9574      | 15968     | 10913     | 21337     | 14382     | 21425     | 21795     |
| LOC105374875 | rs 4959270   | 201       | 10612                       | 6984      | 14205     | 7329      | 11677     | 9892      | 10930     | 18470     |
| IRF4         | rs 12203592  | 206       | 20858                       | 19023     | 48941     | 43764     | 62682     | 44282     | 53318     | 47237     |
| TYR          | rs 1042602   | 210       | 20542                       | 26094     | 38503     | 31511     | 58819     | 35653     | 59102     | 51197     |
| OCA2         | rs 1800407   | 288       | 24464                       | 22341     | 41244     | 38247     | 59238     | 44465     | 54383     | 45806     |
| SLC24SA4     | rs 2402130   | 286       | 29260                       | 9501      | 27665     | 40254     | 24842     | 17354     | 20480     | 36120     |
| HERC2        | rs 12913832  | 391       | 31340                       | 31735     | 67196     | 76494     | 90612     | 59558     | 86923     | 63485     |
| PIGU         | rs 2378249   | 182       | 46221                       | 17052     | 37599     | 43898     | 38553     | 22103     | 36192     | 66935     |
| LOC105370627 | rs 12896399  | 284       | 23998                       | 15942     | 35671     | 40544     | 39744     | 28013     | 40642     | 46811     |
| TYR          | rs 1393350   | 189       | 37634                       | 21259     | 47509     | 51420     | 50969     | 27794     | 49743     | 65476     |
| TYRP1        | rs 683       | 254       | 12872                       | 19687     | 29425     | 23520     | 32910     | 22737     | 26397     | 40830     |

| Gene | Marker      | Threshold | Coverage values (continued) |           |           |           |           |           |           |           |
|------|-------------|-----------|-----------------------------|-----------|-----------|-----------|-----------|-----------|-----------|-----------|
|      |             |           | Sample 17                   | Sample 18 | Sample 19 | Sample 20 | Sample 21 | Sample 22 | Sample 23 | Sample 24 |
| MC1R | rs 11547464 | 249       | 47311                       | 42115     | 62899     | 17489     | 27004     | 42366     | 36730     | 37351     |
| MC1R | rs 885479   | 246       | 46742                       | 41767     | 62244     | 17315     | 26661     | 42023     | 36251     | 37135     |

|              |              |     |       |       |       |       |       |       |       |       |
|--------------|--------------|-----|-------|-------|-------|-------|-------|-------|-------|-------|
| MC1R         | rs1805008    | 249 | 47277 | 42137 | 62883 | 17485 | 26949 | 42354 | 36702 | 37319 |
| MC1R         | rs 1805005   | 308 | 20039 | 19044 | 33195 | 11514 | 15280 | 28834 | 20377 | 30061 |
| MC1R         | rs 1805006   | 318 | 20083 | 19116 | 33360 | 11576 | 15293 | 28922 | 20494 | 30184 |
| MC1R         | rs 1805007   | 249 | 47331 | 42141 | 62941 | 17492 | 27052 | 42350 | 36751 | 37303 |
| TUBB3        | rs 1805009   | 266 | 45073 | 33665 | 55744 | 13404 | 19623 | 33791 | 33620 | 33464 |
| MC1R         | rs 201326893 | 249 | 47380 | 42161 | 62990 | 17521 | 27070 | 42419 | 36772 | 37389 |
| MC1R         | rs 2228479   | 320 | 19855 | 18913 | 32958 | 11444 | 15185 | 28586 | 20268 | 29801 |
| MC1R         | rs 1110400   | 248 | 47324 | 42130 | 62936 | 17513 | 27036 | 42369 | 36698 | 37337 |
| SLC45A2      | rs 28777     | 307 | 68501 | 74009 | 99744 | 19914 | 31884 | 63502 | 53167 | 57143 |
| SLC45A2      | rs 16891982  | 179 | 13994 | 11684 | 18296 | 2324  | 4387  | 12630 | 10389 | 17147 |
| KITLG        | rs 12821256  | 215 | 15712 | 15581 | 22356 | 3309  | 4808  | 13398 | 13063 | 17952 |
| LOC105374875 | rs 4959270   | 201 | 17554 | 18085 | 24708 | 5363  | 9182  | 16328 | 16058 | 21986 |
| IRF4         | rs 12203592  | 206 | 43006 | 36657 | 57875 | 8186  | 11968 | 34638 | 30174 | 36788 |
| TYR          | rs 1042602   | 210 | 42659 | 44612 | 63590 | 8024  | 13869 | 31971 | 33889 | 35554 |
| OCA2         | rs 1800407   | 288 | 39108 | 34247 | 54601 | 7850  | 11152 | 24678 | 24269 | 27355 |
| SLC24SA4     | rs 2402130   | 286 | 29848 | 35213 | 57712 | 10209 | 14867 | 29857 | 34949 | 27779 |
| HERC2        | rs 12913832  | 391 | 64546 | 56675 | 86769 | 11936 | 18047 | 49508 | 46628 | 42708 |
| PIGU         | rs 2378249   | 182 | 50393 | 51533 | 68362 | 17990 | 28325 | 42893 | 42048 | 50941 |
| LOC105370627 | rs 12896399  | 284 | 42923 | 46031 | 65131 | 10747 | 19302 | 41464 | 38981 | 41025 |
| TYR          | rs 1393350   | 189 | 55846 | 56825 | 85102 | 17129 | 29529 | 56260 | 48725 | 63220 |
| TYRP1        | rs 683       | 254 | 30067 | 32785 | 49605 | 7745  | 12421 | 28565 | 25490 | 39943 |

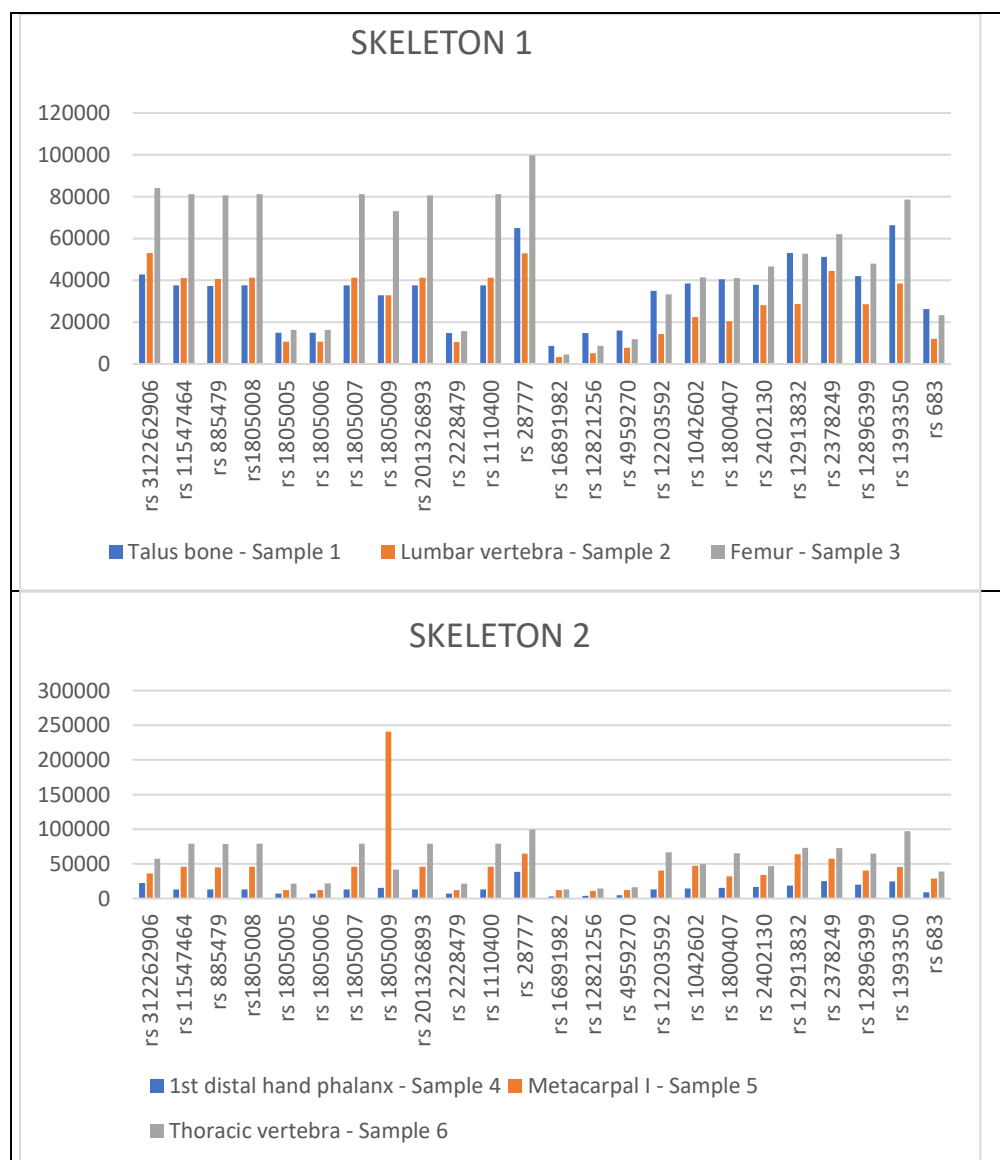

### SKELETON 3

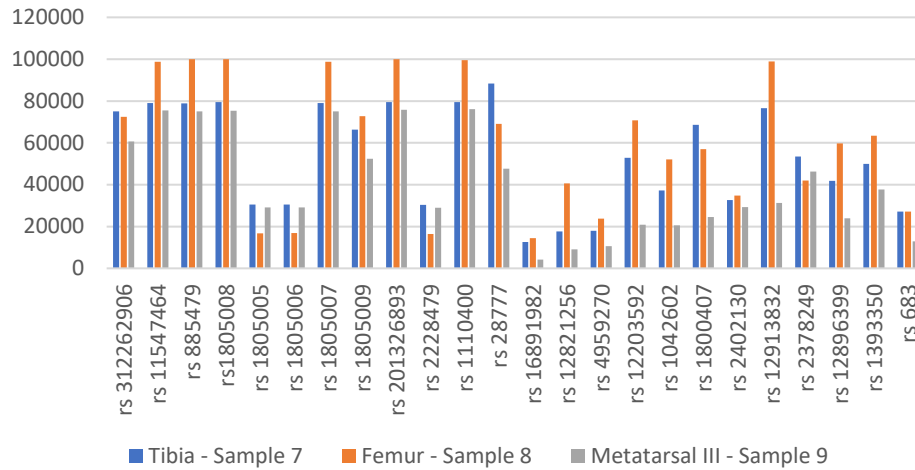

### SKELETON 4

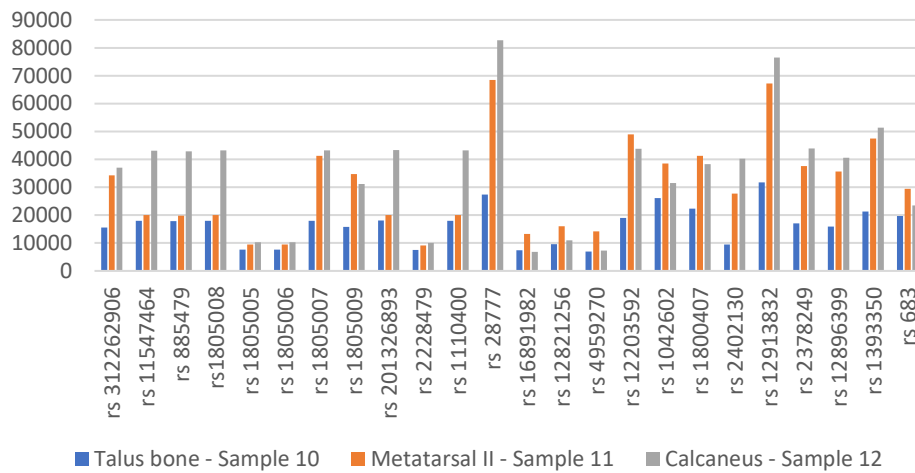

### SKELETON 5

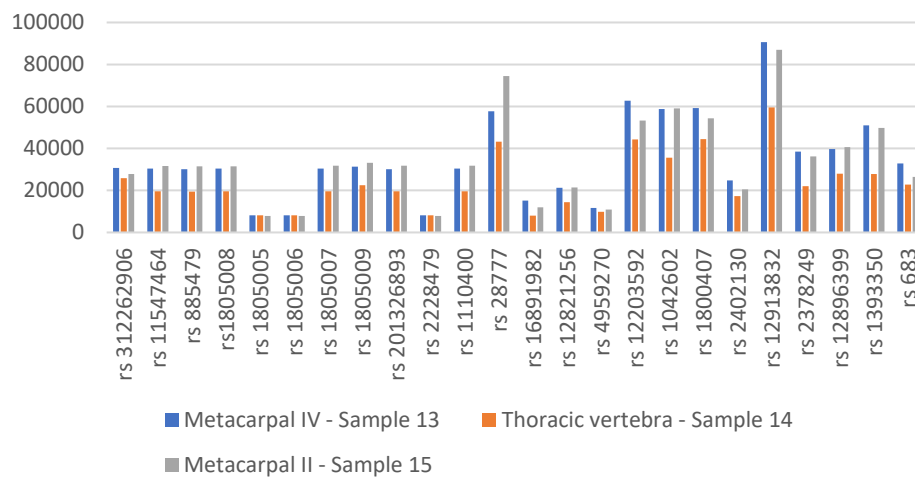

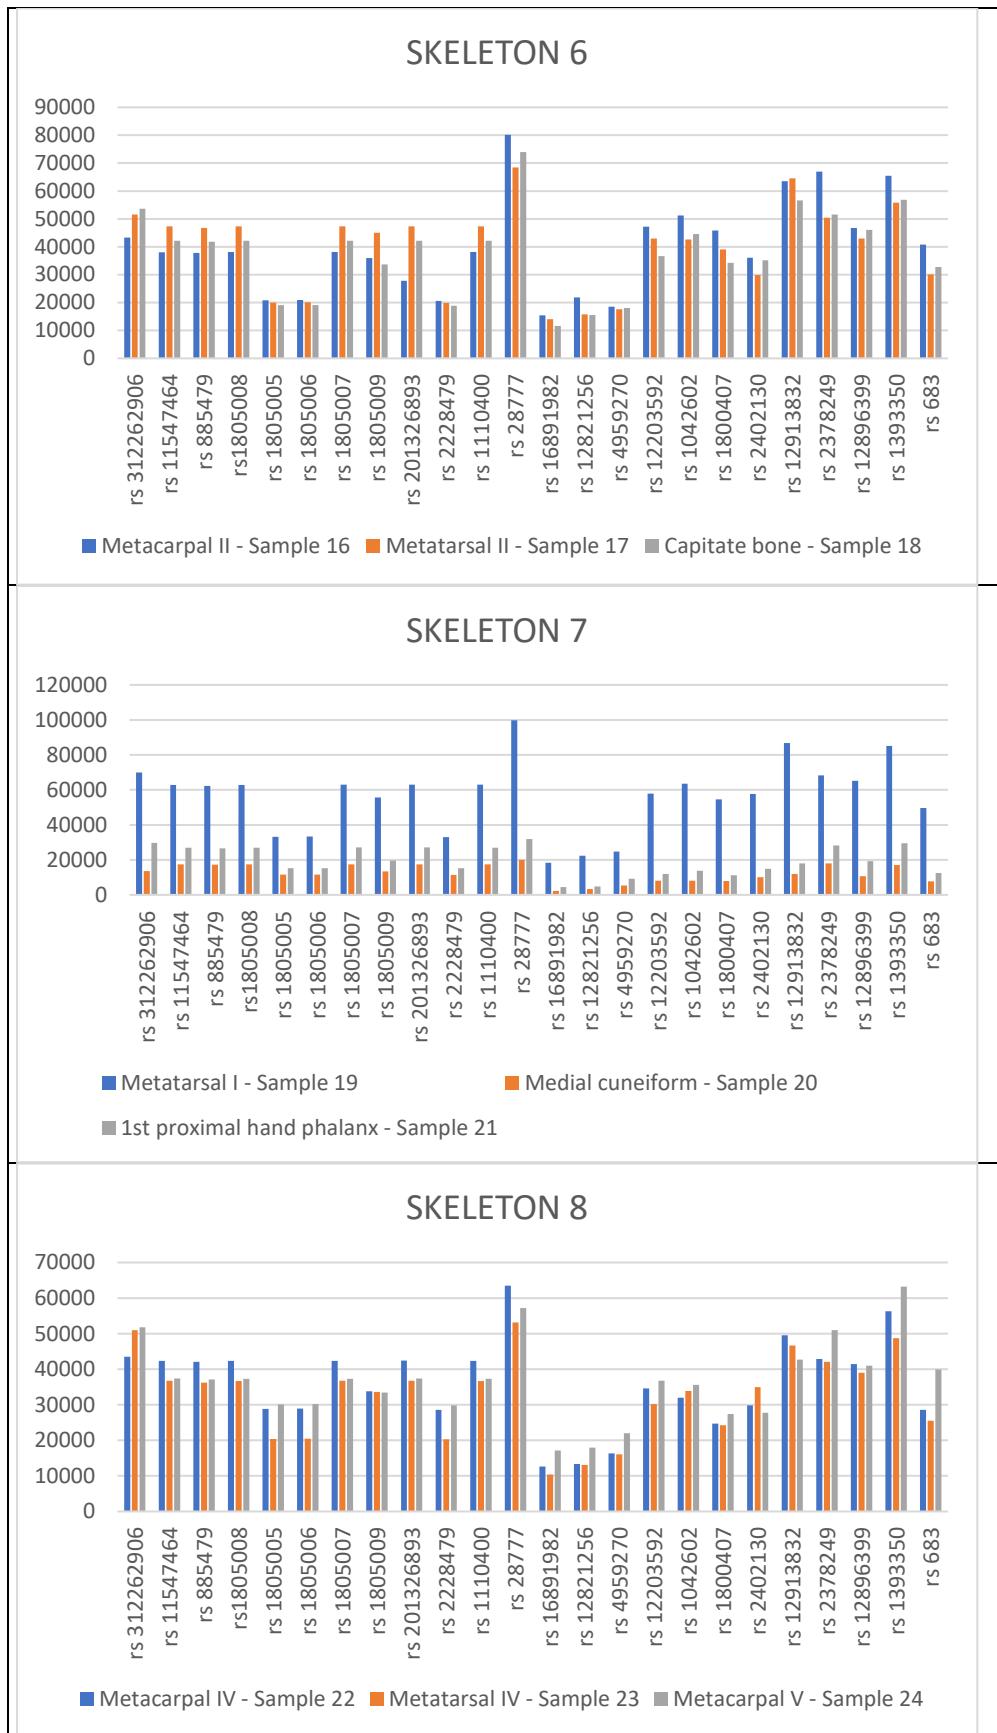

**Figure S2:** coverage values for HIRISplex SNPs for three different skeletal elements per each skeleton analyzed from the Huda Jama Mass Grave.
