# Supplementary material for: A Multisample Approach in Forensic Phenotyping of Chronological Old Skeletal Remains Using Massive Parallel Sequencing (MPS) Technology
Source: MDPI journal article supplement (doi:10.3390/genes14071449), 2023-07-14
Supplement: s1 [file s1]

**Table S4:** Average coverage values for HIRisPlex SNP markers for eight skeletons excavated from the Huda Jama Mass Grave. Averages are calculated from three skeletal elements per skeleton.

| MARKER       | skeleton 1 | skeleton 2 | skeleton 3 | skeleton 4 | skeleton 5 | skeleton 6 | skeleton 7 | skeleton 8 |
|--------------|------------|------------|------------|------------|------------|------------|------------|------------|
| rs 312262906 | 60032      | 38714      | 69379      | 28932      | 28144      | 49503      | 37764      | 48770      |
| rs 11547464  | 53281      | 46110      | 84391      | 27020      | 27245      | 42503      | 35797      | 38816      |
| rs 885479    | 52828      | 45608      | 84598      | 26831      | 27041      | 42119      | 35407      | 38470      |
| rs1805008    | 53321      | 46104      | 84909      | 27057      | 27159      | 42505      | 35772      | 38792      |
| rs 1805005   | 13934      | 13784      | 25432      | 9075       | 8103       | 19984      | 19996      | 26424      |
| rs 1805006   | 13962      | 13864      | 25493      | 9113       | 8116       | 20024      | 20076      | 26533      |
| rs 1805007   | 53365      | 46169      | 84317      | 34176      | 27271      | 42535      | 35828      | 38801      |
| rs 1805009   | 46293      | 99391      | 63862      | 27216      | 28993      | 38238      | 29590      | 33625      |
| rs 201326893 | 53165      | 46197      | 85130      | 27107      | 27197      | 39137      | 35860      | 38860      |
| rs 2228479   | 13654      | 13525      | 25257      | 8935       | 8050       | 19790      | 19862      | 26218      |
| rs 1110400   | 53370      | 46171      | 85076      | 27094      | 27270      | 42520      | 35828      | 38801      |
| rs 28777     | 72536      | 67567      | 68376      | 59515      | 58514      | 74216      | 50514      | 57937      |
| rs 16891982  | 5490       | 9495       | 10447      | 9136       | 11726      | 13702      | 8336       | 13389      |
| rs 12821256  | 9536       | 9746       | 22449      | 12152      | 19048      | 17696      | 10158      | 14804      |
| rs 4959270   | 11914      | 11164      | 17422      | 9506       | 10833      | 18036      | 13084      | 18124      |
| rs 12203592  | 27563      | 40082      | 48153      | 37243      | 53427      | 42300      | 26010      | 33867      |
| rs 1042602   | 34113      | 37226      | 36600      | 32036      | 51191      | 46156      | 28494      | 33805      |
| rs 1800407   | 34049      | 37685      | 50046      | 33944      | 52695      | 39720      | 24534      | 25434      |
| rs 2402130   | 37542      | 32589      | 32212      | 25807      | 20892      | 33727      | 27596      | 30862      |
| rs 12913832  | 44895      | 51865      | 68986      | 58475      | 79031      | 61569      | 38917      | 46281      |
| rs 2378249   | 52574      | 51835      | 47190      | 32850      | 32283      | 56287      | 38226      | 45294      |
| rs 12896399  | 39507      | 41839      | 41844      | 30719      | 36133      | 45255      | 31727      | 40490      |
| rs 1393350   | 61177      | 55739      | 50341      | 40063      | 42835      | 59382      | 43920      | 56068      |
| rs 683       | 20577      | 25586      | 22363      | 24211      | 27348      | 34561      | 23257      | 31333      |

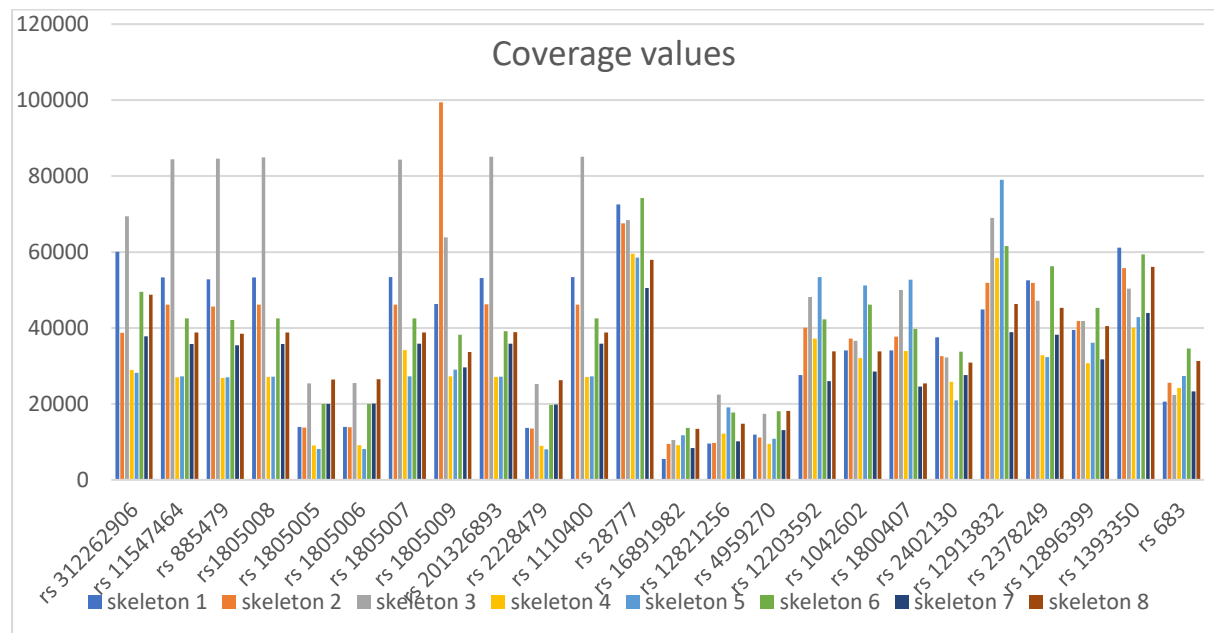

**Figure S3:** Average coverage values for HIRisPlex SNP markers for eight skeletons excavated from the Huda Jama Mass Grave. Averages are calculated from three skeletal elements per skeleton.
